# Supplementary material for: Comparison of the catalytic activity of MOFs and zeolites in Knoevenagel condensation
Source: Royal Society of Chemistry journal article supplement (doi:10.1039/c2cy20586f), 2012-10-04
Supplement: c2cy20586f.pdf [file c2cy20586f.pdf]

## Supporting Information

### COMPARISON OF THE CATALYTIC ACTIVITY OF MOFs AND ZEOLITES IN KNOEVENAGEL CONDENSATION

Maksym Opanasenko, Amarajothi Dhakshinamoorthy, Mariya Shamzhy, Petr Nachtigall, Michal Horáček, Hermenegildo Garcia and Jiri Čejka

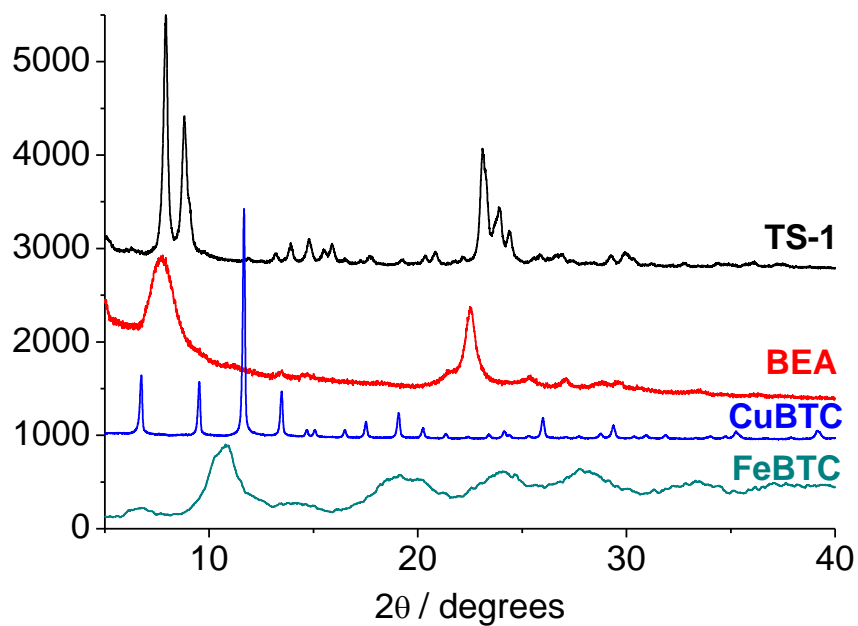

Figure SI-1. XRD patterns of the catalysts under study.

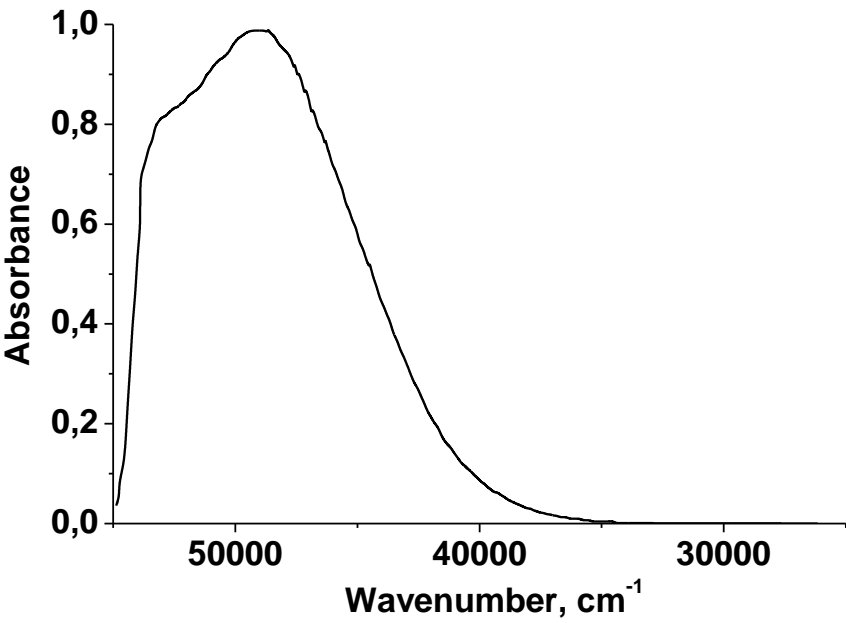

Figure SI-2. UV-VIS spectra of TS-1.

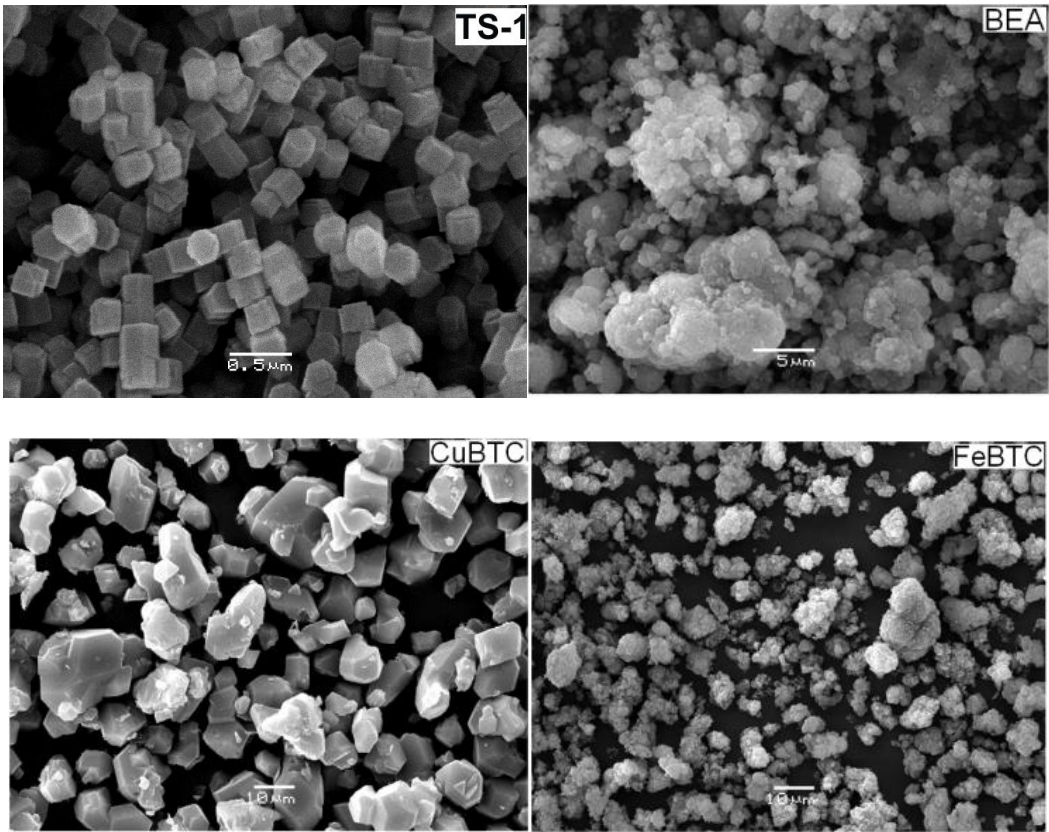

Figure SI-3. SEM images of the catalysts under study.

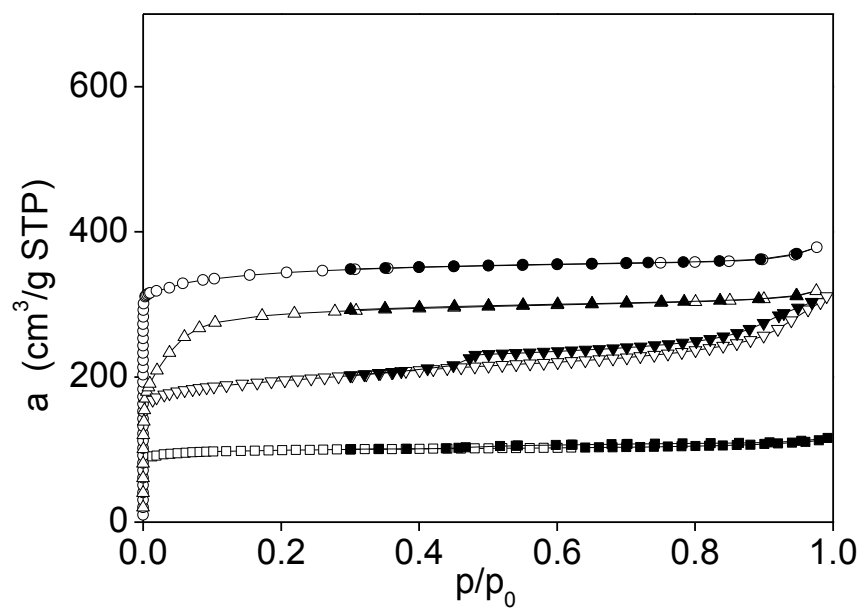

Figure SI-4. Nitrogen adsorption isotherms of the catalysts: CuBTC (O); FeBTC ( $\Delta$ ); BEA ( $\nabla$ ); TS-1 ( $\square$ ), open points represent adsorption, full points - desorption.

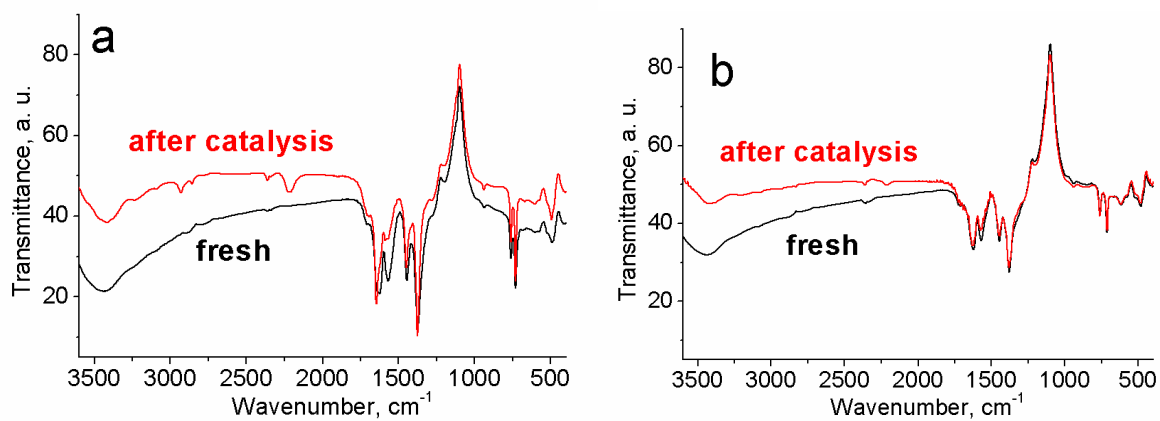

Figure SI-5. FTIR spectra of CuBTC (a) and FeBTC before and after the reaction.
